# Supplementary material
Source: PubMed Central journal article supplement (PMC5339844)
Supplement: cr2016105x2.pdf [file cr2016105x2.pdf]

## Supplementary information, Data S1 Methods

The sixth Chinese Census Data (year 2010) was downloaded from the National Bureau of Statistics of the People's Republic of China (<http://www.stats.gov.cn/tjsj/pcsj/rkpc/6rp/indexch.htm>). Genes associated with aging in humans were downloaded from GenAge Database of Ageing-Related Genes (<http://genomics.senescence.info/genes/>, 2015-12-18). Human genes involved in metabolism were downloaded from Virtual Metabolic Human database (<https://vmh.uni.lu/#home>). Human genes involved in the hypoxia response pathway were retrieved from a previous study <sup>1</sup>.

Genome wide single-nucleotide polymorphisms (SNPs) data genotyped by the Affymetrix Genome-Wide Human SNP 6.0 Array, from 31 unrelated Tibetans were from a previous study <sup>2</sup>, and genotype data of Han people were downloaded from HapMap (phase II, <http://hapmap.ncbi.nlm.nih.gov/>). Genome wide SNPs from 327 whole genome sequence data from sheep, goats, cattle, dogs, pigs and horses, which included 134 genomes from the Tibetan Plateau and 193 genomes from domestic populations from lowland areas, called by a stringent pipeline implemented in the GATK program, were from our unpublished paper. Differentiation of each SNP was calculated using  $F_{ST}$ <sup>3</sup>, XP-EHH (cross population extended haplotype homozygosity)<sup>4</sup>, and  $\Delta DAF$  (the difference of the derived allele frequencies).

Transcriptome data on aging was from 7,074 human peripheral blood samples obtained from a previous study <sup>5</sup>. Detailed information about the samples, expression data analysis can be found in the original publication <sup>5</sup>. Lung tissue transcriptomes

from four Tibetan pigs and four Min pigs from the lowlands were profiled by RNA-sequencing. Reads were aligned against the reference genome of *Sus scrofa* (Sscrofa 10.2) using TopHat v2.0.4 with default parameters<sup>6</sup> using the gene annotation available at Ensembl v77. Transcripts were first assembled using the reference annotation based transcript assembly method using Cufflinks<sup>7</sup>. Novel transcripts were subsequently extracted from the output of the assemblers using a custom Perl script. The reference annotation was then merged with the novel transcripts to generate a new reference annotation file. To quantify gene expression, the FPKM (Fragments Per Kilobase of transcript per Million mapped reads) values were calculated using Cuffmerge without RABT. One-to-one orthologous genes between human and dog, pig, horse, cattle, and sheep were downloaded from Ensembl (<http://www.ensembl.org/>) by BioMart. The one-to-one orthologous genes between human and goat were retrieved by reciprocal best hit BLASTP search. Protein-protein interaction data in human was downloaded from BioGRID (<http://thebiogrid.org/>, BIOGRID-ALL-3.3.124.tab) and InWeb<sup>8</sup> ([http://www.broadinstitute.org/~rossin/InWeb3\\_HC\\_NonRed.txt](http://www.broadinstitute.org/~rossin/InWeb3_HC_NonRed.txt)). The interaction between aging associated genes and hypoxia response genes were counted. For 1000 random simulation, 154 genes and 305 other genes were randomly chosen and the interactions were counted for each simulation.

## References:

1. Huerta-Sanchez, E., DeGiorgio, M., Pagani, L., Tarekegn, A., Ekong, R., Antao, T., Cardona, A., Montgomery, H. E., Cavalleri, G. L., Robbins, P. A., et al. (2013) Genetic signatures reveal high-altitude adaptation in a set of Ethiopian populations. *Mol Biol Evol* 30, 1877-1888
2. Simonson, T. S., Yang, Y., Huff, C. D., Yun, H., Qin, G., Witherspoon, D. J., Bai, Z., Lorenzo, F. R., Xing, J., Jorde, L. B., et al. (2010) Genetic evidence for high-altitude adaptation in Tibet. *Science* 329, 72-75
3. Akey, J. M., Zhang, G., Zhang, K., Jin, L., Shriver, M. D. (2002) Interrogating a high-density SNP map for signatures of natural selection. *Genome Res* 12, 1805-1814
4. Sabeti, P. C., Varilly, P., Fry, B., Lohmueller, J., Hostetter, E., Cotsapas, C., Xie, X., Byrne, E. H., McCarroll, S. A., Gaudet, R., et al. (2007) Genome-wide detection and characterization of positive selection in human populations. *Nature* 449, 913-918
5. Peters, M. J., Joehanes, R., Pilling, L. C., Schurmann, C., Conneely, K. N., Powell, J., Reinmaa, E., Sutphin, G. L., Zhernakova, A., Schramm, K., et al. (2015) The transcriptional landscape of age in human peripheral blood. *Nat Commun* 6, 8570
6. Trapnell, C., Pachter, L., Salzberg, S. L. (2009) TopHat: discovering splice junctions with RNA-Seq. *Bioinformatics* 25, 1105-1111
7. Trapnell, C., Williams, B. A., Pertea, G., Mortazavi, A., Kwan, G., van Baren, M. J., Salzberg, S. L., Wold, B. J., Pachter, L. (2010) Transcript assembly and quantification by RNA-Seq reveals unannotated transcripts and isoform switching during cell differentiation. *Nat Biotech* 28, 511-515
8. Rossin, E. J., Lage, K., Raychaudhuri, S., Xavier, R. J., Tatar, D., Benita, Y., Cotsapas, C., Daly, M. J., International Inflammatory Bowel Disease Genetics, C. (2011) Proteins Encoded in Genomic Regions Associated with Immune-Mediated Disease Physically Interact and Suggest Underlying Biology. *PLoS Genet* 7, e1001273

| <b>aging-associated genes</b> | <b>hypoxia response genes</b> |
|-------------------------------|-------------------------------|
| A2M                           | ABAT                          |
| ABL1                          | ACE                           |
| ADCY5                         | ACSL6                         |
| AGPAT2                        | ACTN4                         |
| AGTR1                         | ADA                           |
| AIFM1                         | ADAM17                        |
| AKT1                          | ADIPOQ                        |
| APEX1                         | ADM                           |
| APOC3                         | ALAS2                         |
| APOE                          | ALDOC                         |
| APP                           | ANG                           |
| APTX                          | ANGPT2                        |
| AR                            | ANGPT4                        |
| ARHGAP1                       | ANGPTL4                       |
| ARNTL                         | APOLD1                        |

|         |        |
|---------|--------|
| ATF2    | AQP1   |
| ATM     | ARNT   |
| ATP5O   | ARNT2  |
| ATR     | ASCL2  |
| BAK1    | ATP1B1 |
| BAX     | BCL2   |
| BCL2    | BIRC2  |
| BDNF    | BMP2   |
| BLM     | BNIP3  |
| BMI1    | CA9    |
| BRCA1   | CAPN2  |
| BRCA2   | CASP1  |
| BSCL2   | CAV1   |
| BUB1B   | CCL2   |
| BUB3    | CCNB1  |
| C1QA    | CD38   |
| CACNA1A | CHRNA4 |
| CAT     | CHRNA7 |
| CCNA2   | CHRNA7 |
| CDC42   | CHRNA7 |
| CDK1    | CHRNA7 |
| CDK7    | CHRNA7 |
| CDKN1A  | CHRNA7 |
| CDKN2A  | CHRNA7 |
| CDKN2B  | CHRNA7 |
| CEBPA   | CHRNA7 |
| CEBPB   | CHRNA7 |
| CETP    | CHRNA7 |
| CHEK2   | CHRNA7 |
| CISD2   | CHRNA7 |
| CLOCK   | CHRNA7 |
| CLU     | CHRNA7 |
| CNR1    | CHRNA7 |
| COQ7    | CHRNA7 |
| CREB1   | CHRNA7 |
| CREBBP  | CHRNA7 |
| CSNK1E  | CHRNA7 |
| CTF1    | CHRNA7 |
| CTGF    | CHRNA7 |
| CTNNB1  | CHRNA7 |
| DBN1    | CHRNA7 |
| DDIT3   | CHRNA7 |
| DGAT1   | CHRNA7 |
| DLL3    | CHRNA7 |
|         | CHRNB2 |
|         | CITED2 |
|         | CLDN3  |
|         | CREBBP |
|         | CRYAA  |
|         | CRYAB  |
|         | CST3   |
|         | CXCR4  |
|         | CYP1A1 |
|         | DDIT4  |
|         | DPP4   |
|         | E2F1   |
|         | ECE1   |
|         | EDN1   |
|         | EDNRA  |
|         | EGLN1  |
|         | EGLN2  |
|         | EGLN3  |
|         | ENG    |
|         | EP300  |
|         | EPAS1  |
|         | EPO    |
|         | ERCC3  |
|         | FLT1   |
|         | GATA6  |
|         | GPR182 |

|        |         |
|--------|---------|
| E2F1   | HIF1A   |
| EEF1A1 | HIF3A   |
| EEF1E1 | HMOX1   |
| EEF2   | HMOX2   |
| EFEMP1 | HSD11B2 |
| EGF    | HSP90B1 |
| EGFR   | HYOU1   |
| EGR1   | IL18    |
| EIF5A2 | ITGA2   |
| ELN    | ITPR1   |
| EMD    | ITPR2   |
| EP300  | JAG2    |
| EPOR   | KCNA5   |
| EPS8   | KCNK3   |
| ERBB2  | KCNMA1  |
| ERCC1  | LCT     |
| ERCC2  | LONP1   |
| ERCC3  | MB      |
| ERCC4  | MMP14   |
| ERCC5  | MMP2    |
| ERCC6  | MT-CYB  |
| ERCC8  | MT-ND4  |
| ESR1   | MT-ND5  |
| FAS    | MT3     |
| FEN1   | NARFL   |
| FGF21  | NF1     |
| FGF23  | NOS1    |
| FGFR1  | NOS3    |
| FLT1   | NPPC    |
| FOS    | P2RX3   |
| FOXM1  | PAM     |
| FOXO1  | PDE5A   |
| FOXO3  | PDGFA   |
| FOXO4  | PDGFB   |
| GCLC   | PDIA2   |
| GCLM   | PDLIM1  |
| GH1    | PGF     |
| GHR    | PLAT    |
| GHRH   | PLAU    |
| GHRHR  | PLD2    |
| GPX1   | PLOD1   |
| GPX4   | PLOD2   |
| GRB2   | PML     |
| GRN    | PPARA   |

|          |          |
|----------|----------|
| GSK3A    | PRKAA1   |
| GSK3B    | PRKCQ    |
| GSR      | PSEN2    |
| GSS      | PTK2B    |
| GSTA4    | PYGM     |
| GSTP1    | RHOA     |
| GTF2H2   | RYR1     |
| H2AFX    | RYR2     |
| HBP1     | SCAP     |
| HDAC1    | SCFD1    |
| HDAC2    | SCNN1B   |
| HDAC3    | SCNN1G   |
| HELLS    | SDC2     |
| HESX1    | SERPINA1 |
| HIC1     | SFRP1    |
| HIF1A    | SHH      |
| HMGB1    | SLC11A2  |
| HMGB2    | SLC2A8   |
| HOXB7    | SLC8A1   |
| HOXC4    | SMAD3    |
| HRAS     | SMAD4    |
| HSF1     | SMAD9    |
| HSP90AA1 | SOCS3    |
| HSPA1A   | SOD2     |
| HSPA1B   | SOD3     |
| HSPA8    | STAT5B   |
| HSPA9    | TFRC     |
| HSPD1    | TGFB1    |
| HTRA2    | TGFB2    |
| HTT      | TGFB3    |
| IGF1     | TGFBR1   |
| IGF1R    | TH       |
| IGF2     | THBS1    |
| IGFBP2   | TLR2     |
| IGFBP3   | TLR4     |
| IKBKB    | TRH      |
| IL2      | TXN2     |
| IL2RG    | UBE2B    |
| IL6      | UBQLN1   |
| IL7      | UCN3     |
| IL7R     | UCP2     |
| INS      | UCP3     |
| INSR     | USF1     |
| IRS1     | VCAM1    |

|        |       |
|--------|-------|
| IRS2   | VEGFA |
| JAK2   | VHL   |
| JUN    | VLDLR |
| JUND   | XRCC1 |
| KCNA3  |       |
| KL     |       |
| LEP    |       |
| LEPR   |       |
| LMNA   |       |
| LMNB1  |       |
| LRP2   |       |
| MAP3K5 |       |
| MAPK14 |       |
| MAPK3  |       |
| MAPK8  |       |
| MAPK9  |       |
| MAPT   |       |
| MAX    |       |
| MDM2   |       |
| MED1   |       |
| MIF    |       |
| MLH1   |       |
| MSRA   |       |
| MT1E   |       |
| MT-CO1 |       |
| MTOR   |       |
| MXD1   |       |
| MXI1   |       |
| MYC    |       |
| NBN    |       |
| NCOR1  |       |
| NCOR2  |       |
| NFE2L1 |       |
| NFE2L2 |       |
| NFKB1  |       |
| NFKB2  |       |
| NFKBIA |       |
| NGF    |       |
| NGFR   |       |
| NOG    |       |
| NR3C1  |       |
| NRG1   |       |
| NUDT1  |       |
| PAPPA  |       |

|          |  |
|----------|--|
| PARP1    |  |
| PCK1     |  |
| PCMT1    |  |
| PCNA     |  |
| PDGFB    |  |
| PDGFRA   |  |
| PDGFRB   |  |
| PDPK1    |  |
| PEX5     |  |
| PIK3CA   |  |
| PIK3CB   |  |
| PIK3R1   |  |
| PIN1     |  |
| PLAU     |  |
| PLCG2    |  |
| PMCH     |  |
| PML      |  |
| POLA1    |  |
| POLB     |  |
| POLD1    |  |
| POLG     |  |
| PON1     |  |
| POU1F1   |  |
| PPARA    |  |
| PPARG    |  |
| PPARGC1A |  |
| PPM1D    |  |
| PPP1CA   |  |
| PRDX1    |  |
| PRKCA    |  |
| PRKCD    |  |
| PRKDC    |  |
| PROP1    |  |
| PSEN1    |  |
| PTEN     |  |
| PTGS2    |  |
| PTK2     |  |
| PTK2B    |  |
| PTPN1    |  |
| PTPN11   |  |
| PYCR1    |  |
| RAD51    |  |
| RAD52    |  |
| RAE1     |  |



|          |  |
|----------|--|
| RB1      |  |
| RECQL4   |  |
| RELA     |  |
| RET      |  |
| RGN      |  |
| RICTOR   |  |
| RPA1     |  |
| S100B    |  |
| SDHC     |  |
| SERPINE1 |  |
| SHC1     |  |
| SIN3A    |  |
| SIRT1    |  |
| SIRT3    |  |
| SIRT6    |  |
| SIRT7    |  |
| SLC13A1  |  |
| SNCG     |  |
| SOCS2    |  |
| SOD1     |  |
| SOD2     |  |
| SP1      |  |
| SPRTN    |  |
| SQSTM1   |  |
| SST      |  |
| SSTR3    |  |
| STAT3    |  |
| STAT5A   |  |
| STAT5B   |  |
| STK11    |  |
| STUB1    |  |
| SUMO1    |  |
| SUN1     |  |
| TAF1     |  |
| TBP      |  |
| TCF3     |  |
| TERC     |  |
| TERF1    |  |
| TERF2    |  |
| TERT     |  |
| TFAP2A   |  |
| TFDP1    |  |
| TGFB1    |  |
| TNF      |  |

|          |  |
|----------|--|
| TOP1     |  |
| TOP2A    |  |
| TOP2B    |  |
| TOP3B    |  |
| TP53     |  |
| TP53BP1  |  |
| TP63     |  |
| TP73     |  |
| TPP2     |  |
| TRAP1    |  |
| TRPV1    |  |
| TXN      |  |
| UBB      |  |
| UBE2I    |  |
| UCHL1    |  |
| UCP1     |  |
| UCP2     |  |
| UCP3     |  |
| VCP      |  |
| VEGFA    |  |
| WRN      |  |
| XPA      |  |
| XRCC5    |  |
| XRCC6    |  |
| YWHAZ    |  |
| ZMPSTE24 |  |
